# Supplementary material for: The influence of snow sublimation and meltwater evaporation on δ D of water vapor in the atmospheric boundary layer of central Europe
Source: Copernicus journal article supplement (doi:10.5194/acp-17-1207-2017), 2017-01-25
Supplement: Supplementary file 1 [file acp-17-1207-2017-supplement.zip]

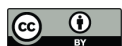

*Supplement of*

**The influence of snow sublimation and meltwater evaporation on  $\delta D$  of water vapor in the atmospheric boundary layer of central Europe**

**Emanuel Christner et al.**

*Correspondence to:* Emanuel Christner ([emanuel.christner@kit.edu](mailto:emanuel.christner@kit.edu))

- [acp-17-1207-2017-supplement-title-page.pdf](#)
- [Karlsruhe\\_dD\\_2012-01-12\\_to\\_2013-05-10.txt](#)

The copyright of individual parts of the supplement might differ from the CC-BY 3.0 licence.
